# Supplementary material for: Image Segmentation Based on Relative Motion and Relative Disparity Cues in Topographically Organized Areas of Human Visual Cortex
Source: PubMed Central journal article supplement (PMC6594975; doi:10.1038/s41598-019-45036-y), 2019-06-26
Supplement: 41598_2019_45036_MOESM1_ESM.pdf [file 41598_2019_45036_MOESM1_ESM.pdf]

**Image segmentation based on relative motion and relative disparity cues  
in topographically organized areas of human visual cortex**

**Supplementary Figures**

Peter J. Kohler\*<sup>a</sup>, Benoit R. Cottureau<sup>b,c</sup> and Anthony M. Norcia<sup>a</sup>

<sup>a</sup>Department of Psychology, Stanford University  
Jordan Hall, Building 420, 450 Serra Mall, Stanford, CA 94305

<sup>b</sup>Université de Toulouse, Centre de Recherche Cerveau et Cognition, Toulouse, France

<sup>c</sup>Centre National de la Recherche Scientifique, Toulouse Cedex, France

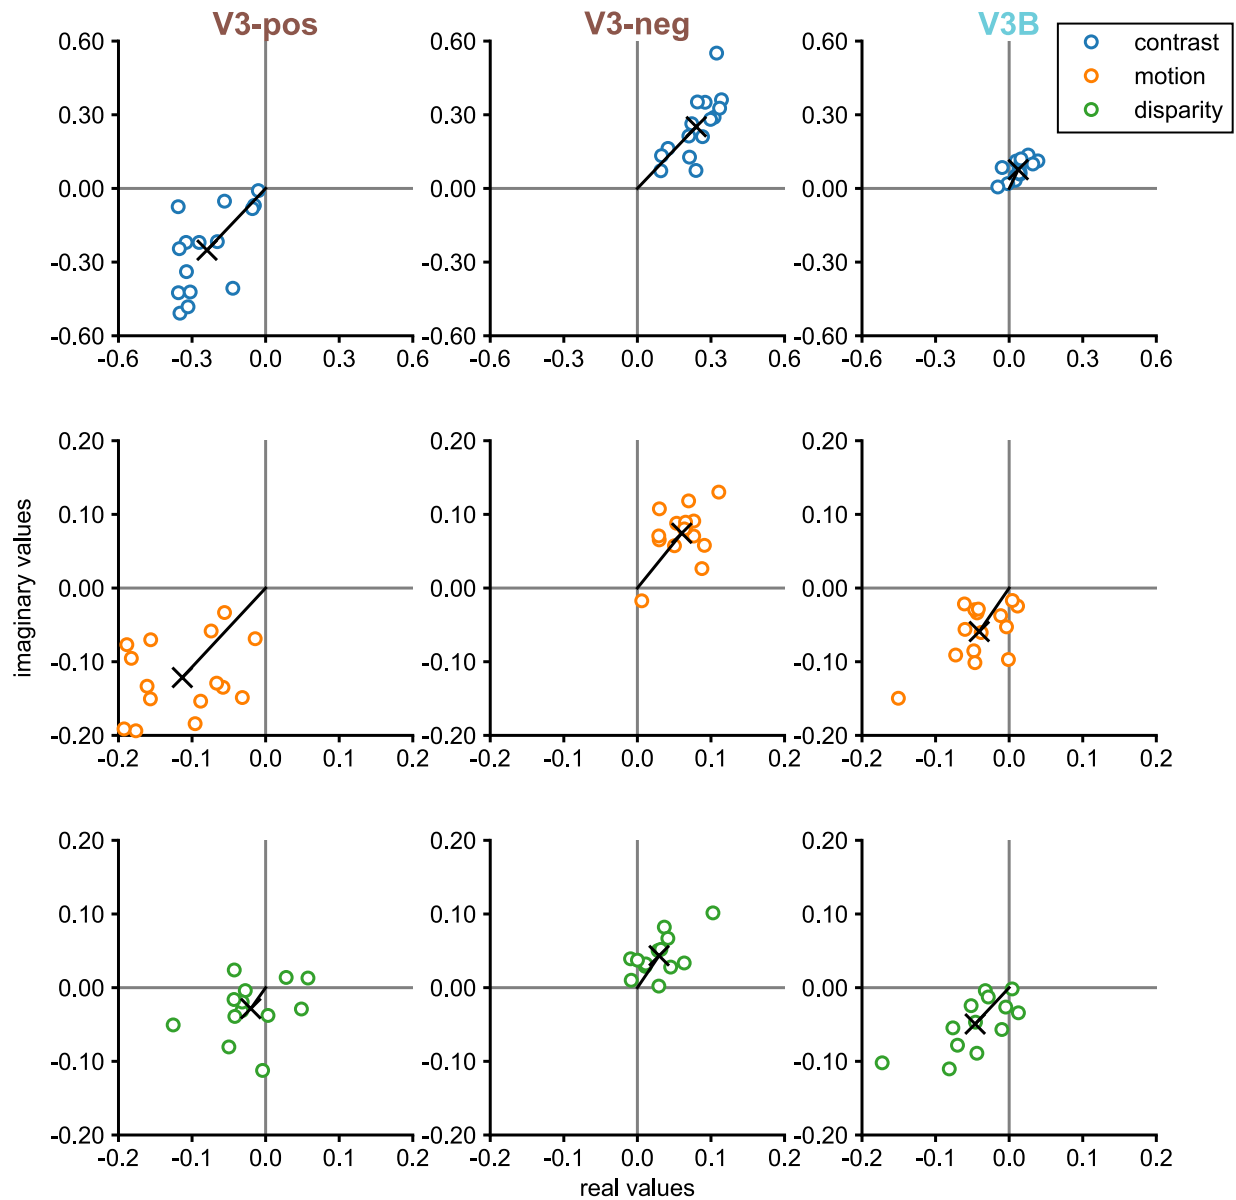

**Supplementary Figure 1: Real and imaginary parts of the response in three example ROIs from Experiment 1:** Each dot indicates the real and imaginary values from an individual subject ( $n=15$  for contrast and motion,  $n = 13$  for disparity). The black “x” indicates the vector average. The first two columns show values from the positively and negatively signed V3 sub-ROIs (“V3-pos” and “V3-neg”) that are highlighted with up and down arrows, respectively, in Figure 2. For comparison, the real and imaginary values from area V3B are plotted in the rightmost column.

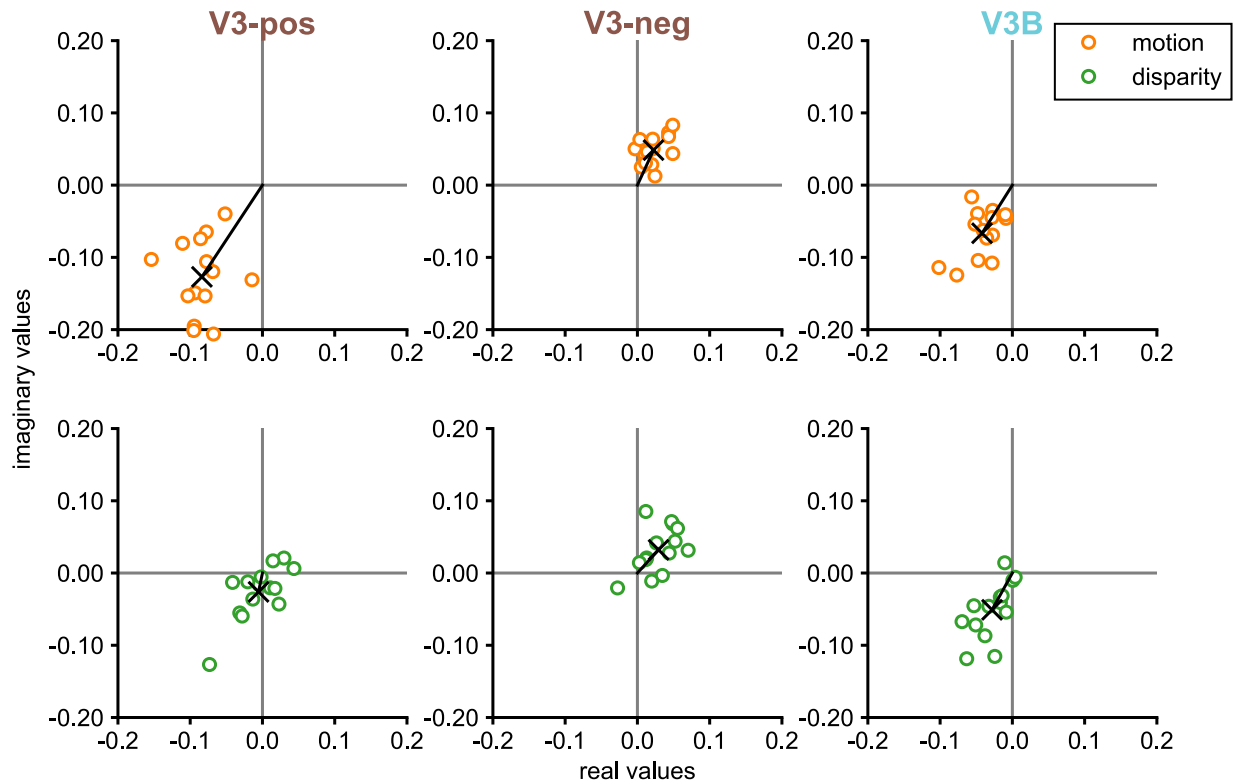

**Supplementary Figure 2: Real and imaginary parts of the response in three example ROIs from Experiment 2:** Each dot indicates the real and imaginary values from an individual subject ( $n=14$ ). The black “x” indicates the vector average. The first two columns show values from the positively and negatively signed V3 sub-ROIs (“V3-pos” and “V3-neg”) that are highlighted with up and down arrows, respectively, in Figure 4. For comparison, the real and imaginary values from area V3B are plotted in the rightmost column.
